# Supplementary material
Source: publisher figshare collection journal article supplement (https://sage.figshare.com/ndownloader/files/17811017)

## Appendix A

### An example of data analysis for the category of pro-action

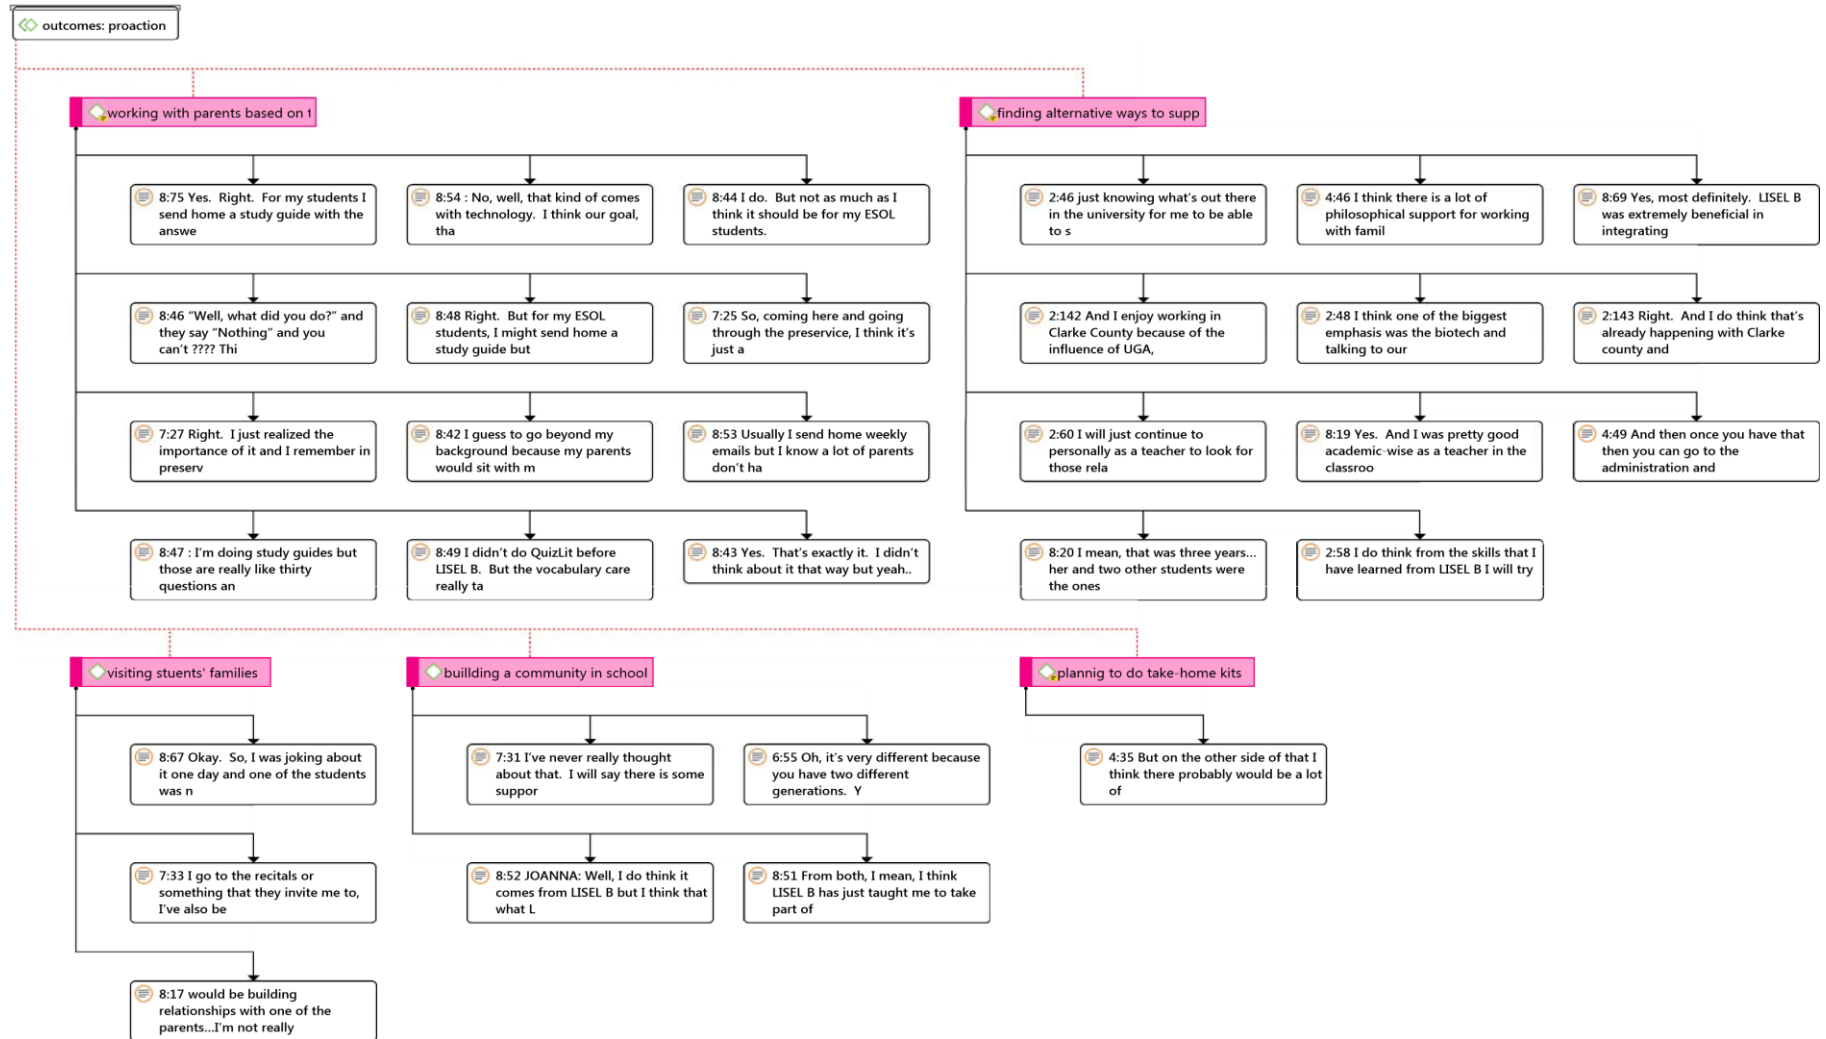

Supplement: Supplementary file 1 [file 17811017]
